# Supplementary material for: Role of porosity and polarity of nanoporous carbon spheres in adsorption applications
Source: Royal Society of Chemistry journal article supplement (doi:10.1039/c7ra09360h), 2017-01-01
Supplement: c7ra09360h1.pdf [file c7ra09360h1.pdf]

Supporting information for

## Role of Porosity and Polarity of Nanoporous Carbon Spheres in Adsorption Applications

Hee Soo Kim<sup>1</sup>, Seunghun Lee<sup>1</sup>, Dong Kwan Kim<sup>1</sup>, Yong-Woo Lee<sup>1,2,\*</sup>, and Won Cheol Yoo<sup>1,2,\*</sup>

<sup>1</sup> Department of Applied Chemistry, Hanyang University, Ansan 15588, Republic of Korea  
E-mail: yongwoolee@hanyang.ac.kr; E-mail: wcyoo@hanyang.ac.kr

<sup>2</sup> Department of Chemical and Molecular Engineering, Hanyang University, Ansan 15588, Republic of Korea

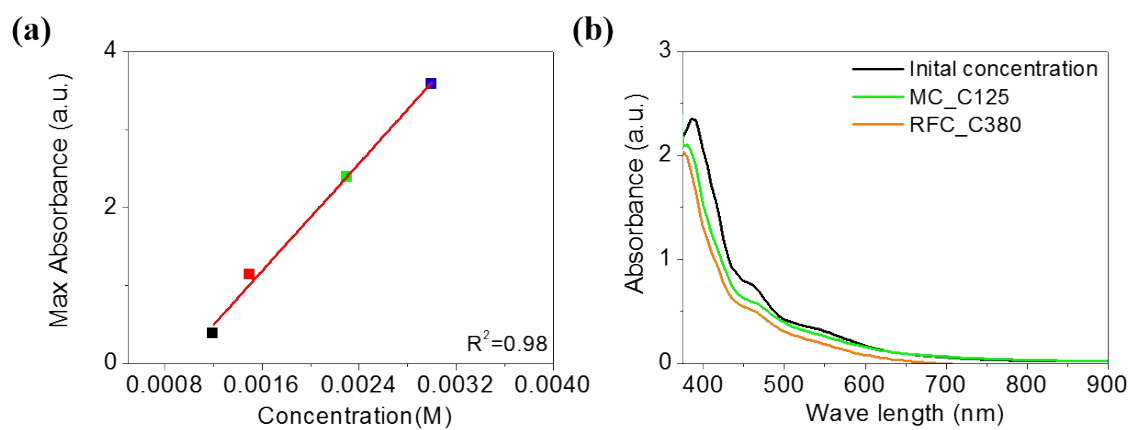

**Fig S1.** The calibration curve of the different concentrations of Fe<sup>2+</sup> (a) and UV-Vis results for carbon samples (b).

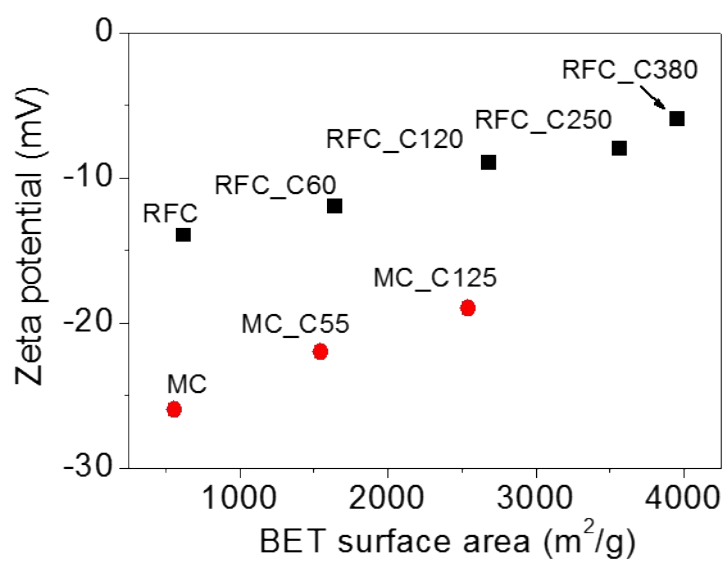

**Fig S2.** The zeta potential results for RFC and MC samples

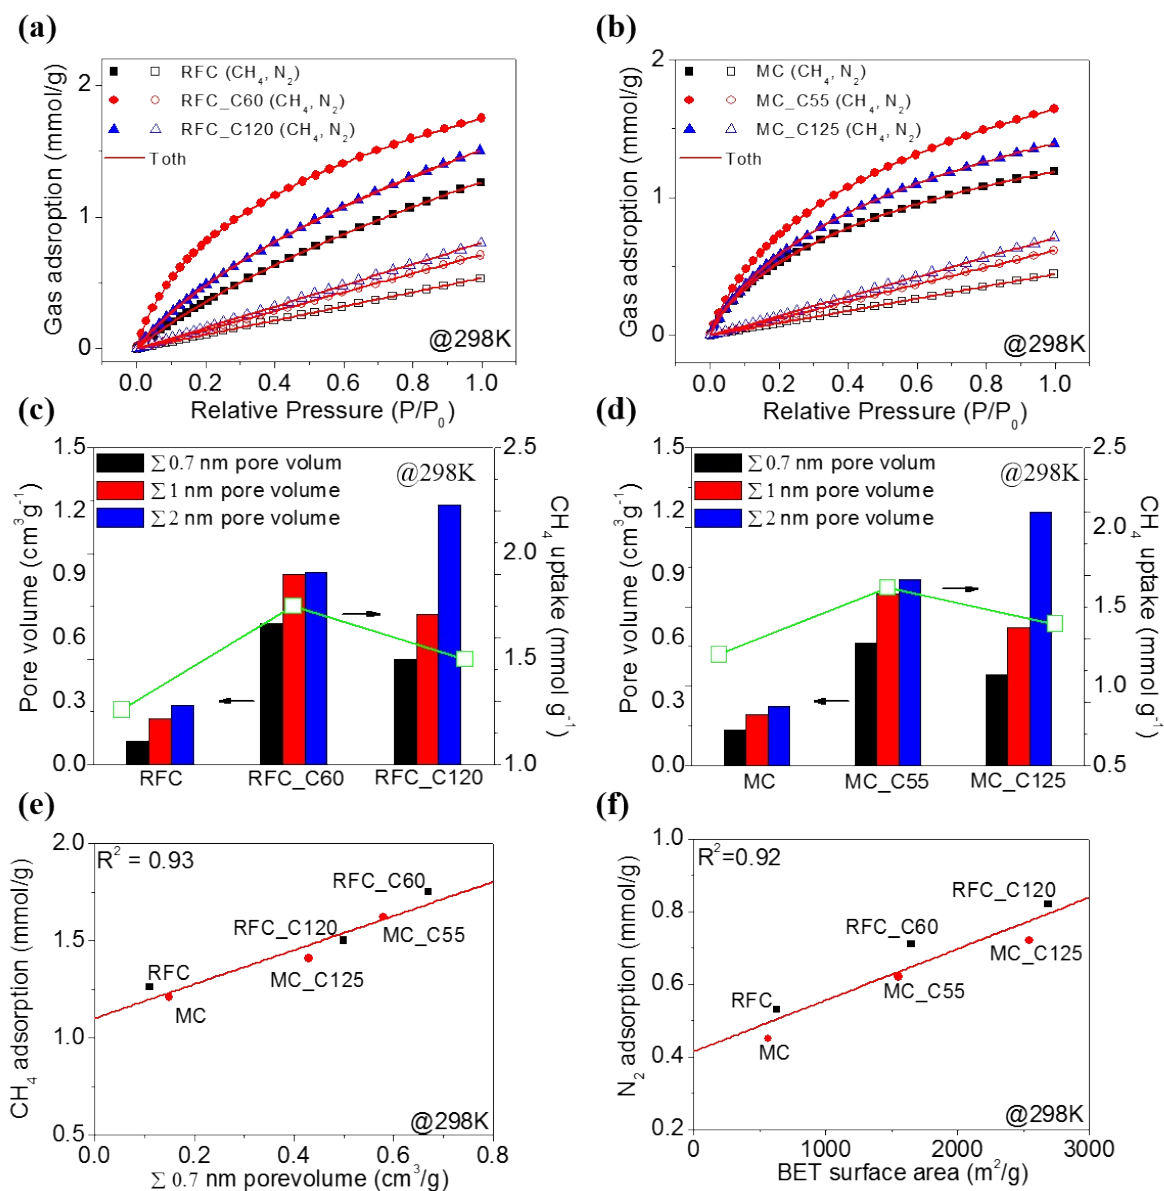

**Fig S3.** CH<sub>4</sub> and N<sub>2</sub> isotherm of RFC (a) and MC (b) samples at 298K (red line is Toth isotherm fitting). Distribution of pore volumes between pores of less than 0.7 nm (black), less than 1 nm (red), and less than 2 nm (blue) of RFC (c) and MC (d) samples at 298K. Relationship plot of CH<sub>4</sub> adsorption capacities with respect to accumulated ultramicropore volume of 0.7 nm (e) and Relationship plot of N<sub>2</sub> adsorption capacities with respect to BET surface area (d) of RFC and MC samples at 298K

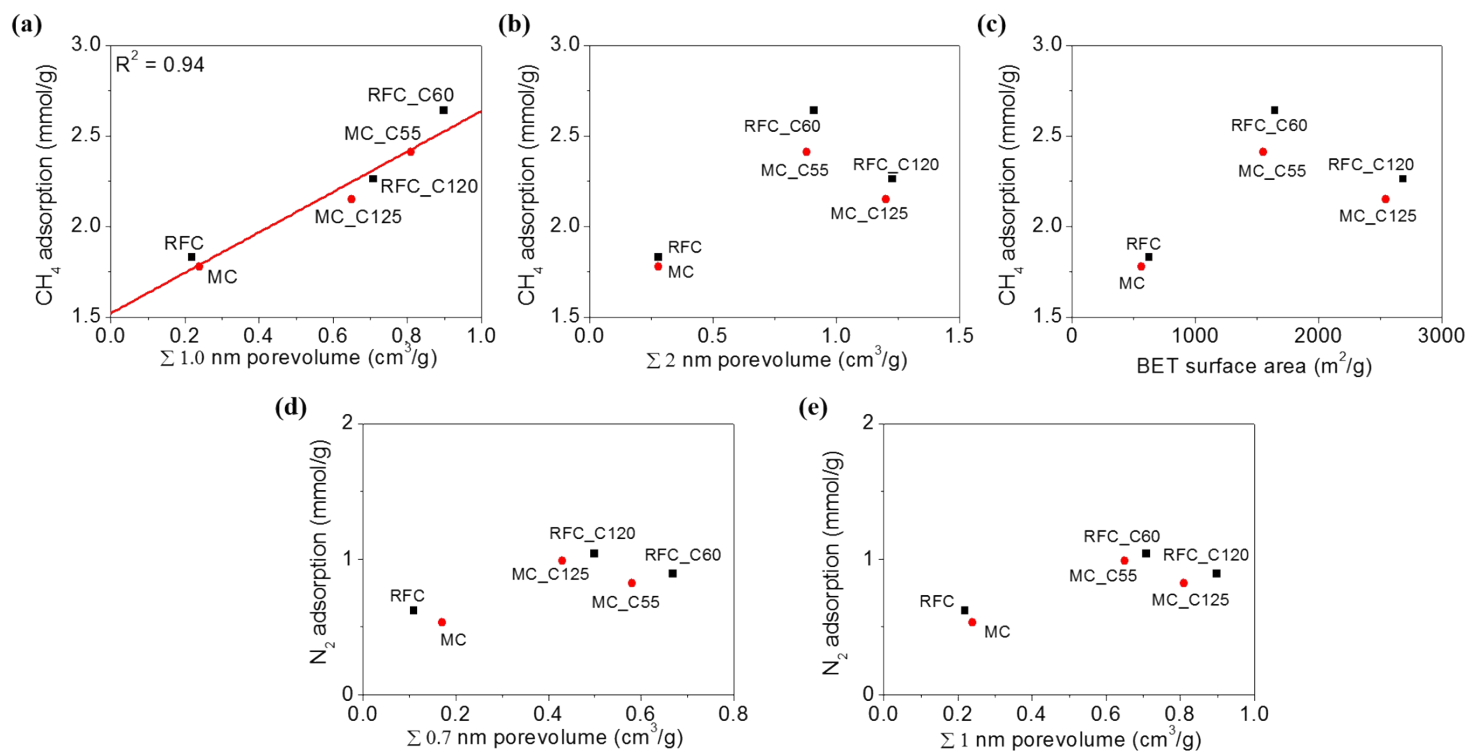

**Fig S4.** Relationship plot of CH<sub>4</sub> adsorption capacities with respect to accumulated ultramicropore volume of 1 nm (a), 2 nm (b) and BET surface area (c) of RFC and MC samples at 273K. Relationship plot of N<sub>2</sub> adsorption capacities with respect to accumulated ultramicropore volume of 0.7 nm (d) and 1 nm (e) of RFC and MC samples at 273K.

| Wavenumber (cm <sup>-1</sup> ) | Functional group                                           |
|--------------------------------|------------------------------------------------------------|
| 1260                           | Pyrrole ring out of plane                                  |
| 1389                           | C-N stretching                                             |
| 1405                           | Pyridine N oxide (N=O vibrations)                          |
| 1513                           | C=N vibrations                                             |
| 1610                           | COO antisymmetric stretch<br>/ C=C aromatic ring vibration |

**Table S1.** Assignments of FT-IR peaks of RFC\_C60 and MC\_C55.

| Sample   | $q_m / \text{CH}_4$ | $q_m / \text{N}_2$ | $K_i / \text{CH}_4$ | $K_i / \text{N}_2$ | $n / \text{CH}_4$ | $n / \text{N}_2$ |
|----------|---------------------|--------------------|---------------------|--------------------|-------------------|------------------|
|          | (273K / 298K)       | (273K / 298K)      | (273K / 298K)       | (273K / 298K)      | (273K / 298K)     | (273K / 298K)    |
| RFC      | 2.6 / 2.34          | 1.4 / 1.1          | 1.12 / 0.74         | 0.51 / 0.36        | 0.67 / 0.63       | 0.91 / 0.95      |
| RFC_C60  | 3.2 / 2.84          | 1.6 / 1.3          | 1.4 / 0.98          | 0.55 / 0.4         | 0.5 / 0.52        | 0.88 / 0.89      |
| RFC_C120 | 2.82 / 2.55         | 1.82 / 1.59        | 1.24 / 0.87         | 0.65 / 0.52        | 0.58 / 0.56       | 0.8 / 0.82       |
| MC       | 2.51 / 2.12         | 1.0 / 0.91         | 1.02 / 0.7          | 0.45 / 0.3         | 0.68 / 0.65       | 0.92 / 0.94      |
| MC_C55   | 2.9 / 2.41          | 1.2 / 1.0          | 1.31 / 0.94         | 0.47 / 0.32        | 0.51 / 0.54       | 0.9 / 0.92       |
| MC_C125  | 2.75 / 2.26         | 1.67 / 1.54        | 1.11 / 0.79         | 0.57 / 0.5         | 0.6 / 0.58        | 0.81 / 0.84      |

**Table S2.** Parameters obtained from Töth models for  $\text{CH}_4$  and  $\text{N}_2$  adsorption at 273K and 298K.

| Sample   | CH <sub>4</sub><br>Adsorption<br>(273K/298K)<br>(mmol/g) | N <sub>2</sub><br>Adsorption<br>(273K/298K)<br>(mmol/g) | CH <sub>4</sub><br>Slope<br>(273K/298K)<br>(0-0.1 bar) | N <sub>2</sub><br>Slope<br>(273K/298K)<br>(0-0.1bar) | Selectivity<br>(CH <sub>4</sub> /N <sub>2</sub> )<br>(273K/298K) |
|----------|----------------------------------------------------------|---------------------------------------------------------|--------------------------------------------------------|------------------------------------------------------|------------------------------------------------------------------|
| RFC      | 1.83 / 1.26                                              | 0.62 / 0.53                                             | 4.0 / 2.1                                              | 1.05 / 0.51                                          | 3.8 / 4.2                                                        |
| RFC_C60  | 2.64 / 1.75                                              | 0.89 / 0.71                                             | 5.8 / 4.9                                              | 1.01 / 0.72                                          | 5.7 / 6.8                                                        |
| RFC_C120 | 2.26 / 1.50                                              | 1.04 / 0.82                                             | 4.13 / 3.2                                             | 0.84 / 0.6                                           | 4.9 / 5.3                                                        |
| MC       | 1.78 / 1.19                                              | 0.59 / 0.45                                             | 4.2 / 3.2                                              | 0.9 / 0.6                                            | 4.7 / 5.3                                                        |
| MC_C55   | 2.41 / 1.62                                              | 0.82 / 0.62                                             | 6.2 / 4.46                                             | 1.01 / 0.6                                           | 6.1 / 7.4                                                        |
| MC_C125  | 2.15 / 1.39                                              | 0.99 / 0.72                                             | 5.4 / 3.94                                             | 0.95 / 0.66                                          | 5.7 / 6.0                                                        |

**Table S3.** CH<sub>4</sub>, N<sub>2</sub> uptake capacities and CH<sub>4</sub>, N<sub>2</sub> slope at 0 – 0.1 bar for RFC and MC samples.
